# Supplementary material for: Physiologically based cord clamping for infants ≥32+0 weeks gestation: A randomised clinical trial and reference percentiles for heart rate and oxygen saturation for infants ≥35+0 weeks gestation
Source: PubMed Central journal article supplement (PMC9269938; doi:10.1371/journal.pmed.1004029), 2022-06-23
Supplement: pmed.1004029.s004.pdf [file pmed.1004029.s004.pdf]

## Supplementary Material

Supplement to: Badurdeen S, Davis PG, Hooper SB et al. Physiologically-based cord clamping for infants  $\geq 32^{+0}$  weeks gestation - a randomised clinical trial and reference percentiles for heart rate and oxygen saturation.

### Contents

|                                                            | Pages |
|------------------------------------------------------------|-------|
| 1. Supplemental Table A. Safety Outcomes                   | 2     |
| 2. Percentiles tables for heart rate and oxygen saturation | 3-4   |
| 3. Supplemental Figures                                    | 5-6   |

**Supplemental Table A.** Summary statistics and selected group differences (where estimable) for safety outcomes.

*Supplemental Table A: Safety outcomes*

|                                                                                                         | <b>PBCC arm<br/>(N = 63)</b> | <b>ECC arm<br/>(N = 60)</b> | <b>Risk<br/>Difference<br/>(95% CI)</b> |
|---------------------------------------------------------------------------------------------------------|------------------------------|-----------------------------|-----------------------------------------|
| <b>Maternal</b>                                                                                         |                              |                             |                                         |
| Post-partum haemorrhage $\geq$ 1 L or the need for blood transfusion                                    | 6 (10%)                      | 5 (8%)                      | 1.2% (-8.9%, 11.3%)                     |
| Maternal post-partum haemorrhage between 500ml-999ml without blood transfusion                          | 15 (24%)                     | 14 (23%)                    | 0.5% (-14.5%, 15.5%)                    |
| Critical care admission                                                                                 | 0 (0%)                       | 1 (2%)                      |                                         |
| Infection up to 30 days after caesarean birth only <sup>^</sup>                                         | 1 (4%)<br>N=27               | 0 (0%)<br>N=25              |                                         |
| Thromboembolic event up to 30 days after caesarean birth                                                | 0 (0%)<br>N=27               | 0 (0%)<br>N=25              |                                         |
| Maternal death                                                                                          | 0 (0%)                       | 0 (0%)                      |                                         |
| <b>Infant</b>                                                                                           |                              |                             |                                         |
| Intubation in the delivery room                                                                         | 0 (0%)                       | 0 (0%)                      |                                         |
| Chest compressions in the delivery room                                                                 | 0 (0%)                       | 0 (0%)                      |                                         |
| Admissions to Neonatal Intensive Care for infants $\geq$ 36 weeks' gestation*                           | 2 (4%)<br>N=56               | 1 (2%)<br>N=54              |                                         |
| First temperature $<$ 36.5 degrees Celsius                                                              | 13 (21%)                     | 10 (17%)                    | 4.0% (-9.8%, 17.7%)                     |
| First temperature $<$ 35.5 degrees Celsius                                                              | 1 (2%)                       | 1 (2%)                      |                                         |
| Pneumothorax treated with needle aspiration and/or chest tube insertion                                 | 0 (0%)                       | 0 (0%)                      |                                         |
| Jaundice treated with exchange transfusion                                                              | 0 (0%)                       | 0 (0%)                      |                                         |
| Polycythaemia requiring partial exchange transfusion                                                    | 0 (0%)                       | 0 (0%)                      |                                         |
| Hypoxic ischaemic encephalopathy treated with therapeutic hypothermia                                   | 0 (0%)                       | 1 (2%)                      |                                         |
| Significant acquired brain injury (on imaging or clinical diagnosis) as documented by the clinical team | 0 (0%)                       | 0 (0%)                      |                                         |
| Neonatal death                                                                                          | 0 (0%)                       | 0 (0%)                      |                                         |

<sup>^</sup> Maternal post-caesarean infection was defined as maternal hospital re-attendance and commencement of antibiotic therapy (oral or intravenous) by emergency or maternity clinical teams.

\*Does not include admissions to special care nursery.

Note, no adjustment for the randomisation stratification factors is made in the risk difference.

Abbreviations: CI, confidence interval; ECC, early cord clamping; L, litre; PBCC, physiologically-based cord clamping.

**Percentiles tables for heart rate and oxygen saturation (SpO<sub>2</sub>) for infants  $\geq 35^{+0}$  weeks' gestation and no respiratory support after birth.**

**Supplemental Table B. Percentiles tables for heart rate and oxygen saturation for all births.**

| All births<br>N=295  | Centile | 97  | 90  | 75  | 50  | 25  | 10  | 3   |
|----------------------|---------|-----|-----|-----|-----|-----|-----|-----|
|                      | Minutes |     |     |     |     |     |     |     |
| Heart Rate<br>(bpm)  | 1       | 213 | 200 | 186 | 171 | 156 | 143 | 130 |
|                      | 2       | 212 | 200 | 187 | 173 | 158 | 146 | 133 |
|                      | 3       | 210 | 198 | 186 | 172 | 158 | 146 | 134 |
|                      | 4       | 208 | 196 | 184 | 171 | 157 | 145 | 133 |
|                      | 5       | 205 | 194 | 182 | 169 | 156 | 144 | 132 |
|                      | 6       | 203 | 192 | 180 | 167 | 153 | 141 | 130 |
|                      | 7       | 201 | 190 | 177 | 164 | 151 | 139 | 127 |
|                      | 8       | 200 | 188 | 175 | 162 | 148 | 135 | 123 |
|                      | 9       | 199 | 186 | 173 | 159 | 144 | 132 | 119 |
|                      | 10      | 198 | 185 | 171 | 156 | 141 | 127 | 114 |
|                      |         |     |     |     |     |     |     |     |
| SpO <sub>2</sub> (%) | 1       | 92  | 84  | 75  | 66  | 56  | 47  | 39  |
|                      | 2       | 98  | 90  | 82  | 73  | 63  | 55  | 47  |
|                      | 3       | 100 | 96  | 89  | 81  | 73  | 66  | 58  |
|                      | 4       | 100 | 99  | 93  | 86  | 79  | 72  | 66  |
|                      | 5       | 100 | 100 | 95  | 89  | 83  | 78  | 72  |
|                      | 6       | 100 | 100 | 97  | 91  | 86  | 82  | 77  |
|                      | 7       | 100 | 100 | 98  | 93  | 89  | 85  | 81  |
|                      | 8       | 100 | 100 | 99  | 95  | 91  | 87  | 83  |
|                      | 9       | 100 | 100 | 100 | 96  | 92  | 88  | 85  |
|                      | 10      | 100 | 100 | 100 | 97  | 93  | 89  | 85  |

**Supplemental Table C. Percentiles tables for heart rate and oxygen saturation for caesarean births.**

| Caesarean Births<br>N=134 | Centile | 97  | 90  | 75  | 50  | 25  | 10  | 3   |
|---------------------------|---------|-----|-----|-----|-----|-----|-----|-----|
|                           | Minutes |     |     |     |     |     |     |     |
| Heart Rate<br>(bpm)       | 1       | 206 | 193 | 180 | 165 | 150 | 137 | 124 |
|                           | 2       | 206 | 194 | 181 | 167 | 153 | 141 | 129 |
|                           | 3       | 204 | 192 | 180 | 167 | 153 | 141 | 130 |
|                           | 4       | 201 | 190 | 178 | 165 | 152 | 141 | 129 |
|                           | 5       | 199 | 187 | 176 | 163 | 150 | 139 | 128 |
|                           | 6       | 196 | 185 | 173 | 161 | 148 | 137 | 125 |
|                           | 7       | 194 | 183 | 171 | 158 | 145 | 133 | 122 |
|                           | 8       | 192 | 180 | 168 | 155 | 142 | 130 | 118 |
|                           | 9       | 190 | 178 | 166 | 152 | 138 | 126 | 114 |
|                           | 10      | 189 | 176 | 163 | 149 | 134 | 121 | 108 |
|                           |         |     |     |     |     |     |     |     |
| SpO <sub>2</sub> (%)      | 1       | 77  | 68  | 59  | 50  | 40  | 31  | 22  |
|                           | 2       | 94  | 87  | 79  | 70  | 61  | 53  | 45  |
|                           | 3       | 100 | 93  | 86  | 79  | 71  | 64  | 57  |
|                           | 4       | 100 | 97  | 91  | 84  | 77  | 71  | 65  |

|  |    |     |     |     |    |    |    |    |
|--|----|-----|-----|-----|----|----|----|----|
|  | 5  | 100 | 99  | 94  | 88 | 82 | 76 | 71 |
|  | 6  | 100 | 100 | 95  | 90 | 85 | 81 | 76 |
|  | 7  | 100 | 100 | 97  | 92 | 88 | 84 | 80 |
|  | 8  | 100 | 100 | 98  | 94 | 90 | 86 | 83 |
|  | 9  | 100 | 100 | 100 | 95 | 91 | 88 | 84 |
|  | 10 | 100 | 100 | 100 | 97 | 92 | 88 | 84 |

**Supplemental Table D. Percentiles tables for heart rate and oxygen saturation for vaginal births.**

| Vaginal Births<br>N=161 | Centile | 97  | 90  | 75  | 50  | 25  | 10  | 3   |
|-------------------------|---------|-----|-----|-----|-----|-----|-----|-----|
|                         | Minutes |     |     |     |     |     |     |     |
| Heart Rate<br>(bpm)     | 1       | 217 | 204 | 191 | 176 | 161 | 148 | 135 |
|                         | 2       | 216 | 203 | 191 | 177 | 163 | 151 | 138 |
|                         | 3       | 213 | 202 | 190 | 176 | 163 | 151 | 139 |
|                         | 4       | 211 | 199 | 188 | 175 | 162 | 150 | 139 |
|                         | 5       | 208 | 197 | 186 | 173 | 160 | 149 | 138 |
|                         | 6       | 206 | 195 | 184 | 171 | 158 | 147 | 136 |
|                         | 7       | 205 | 193 | 182 | 169 | 156 | 144 | 133 |
|                         | 8       | 203 | 192 | 180 | 167 | 153 | 141 | 130 |
|                         | 9       | 203 | 190 | 178 | 164 | 150 | 138 | 126 |
|                         | 10      | 202 | 189 | 176 | 162 | 147 | 134 | 121 |
| SpO <sub>2</sub> (%)    | 1       | 84  | 76  | 67  | 57  | 47  | 38  | 29  |
|                         | 2       | 99  | 91  | 83  | 74  | 66  | 58  | 50  |
|                         | 3       | 100 | 97  | 90  | 82  | 74  | 67  | 60  |
|                         | 4       | 100 | 100 | 94  | 87  | 80  | 74  | 68  |
|                         | 5       | 100 | 100 | 96  | 90  | 84  | 79  | 74  |
|                         | 6       | 100 | 100 | 97  | 92  | 87  | 83  | 78  |
|                         | 7       | 100 | 100 | 99  | 94  | 90  | 86  | 82  |
|                         | 8       | 100 | 100 | 100 | 96  | 91  | 88  | 84  |
|                         | 9       | 100 | 100 | 100 | 97  | 93  | 89  | 85  |
|                         | 10      | 100 | 100 | 100 | 98  | 93  | 90  | 86  |

Supplemental Figures

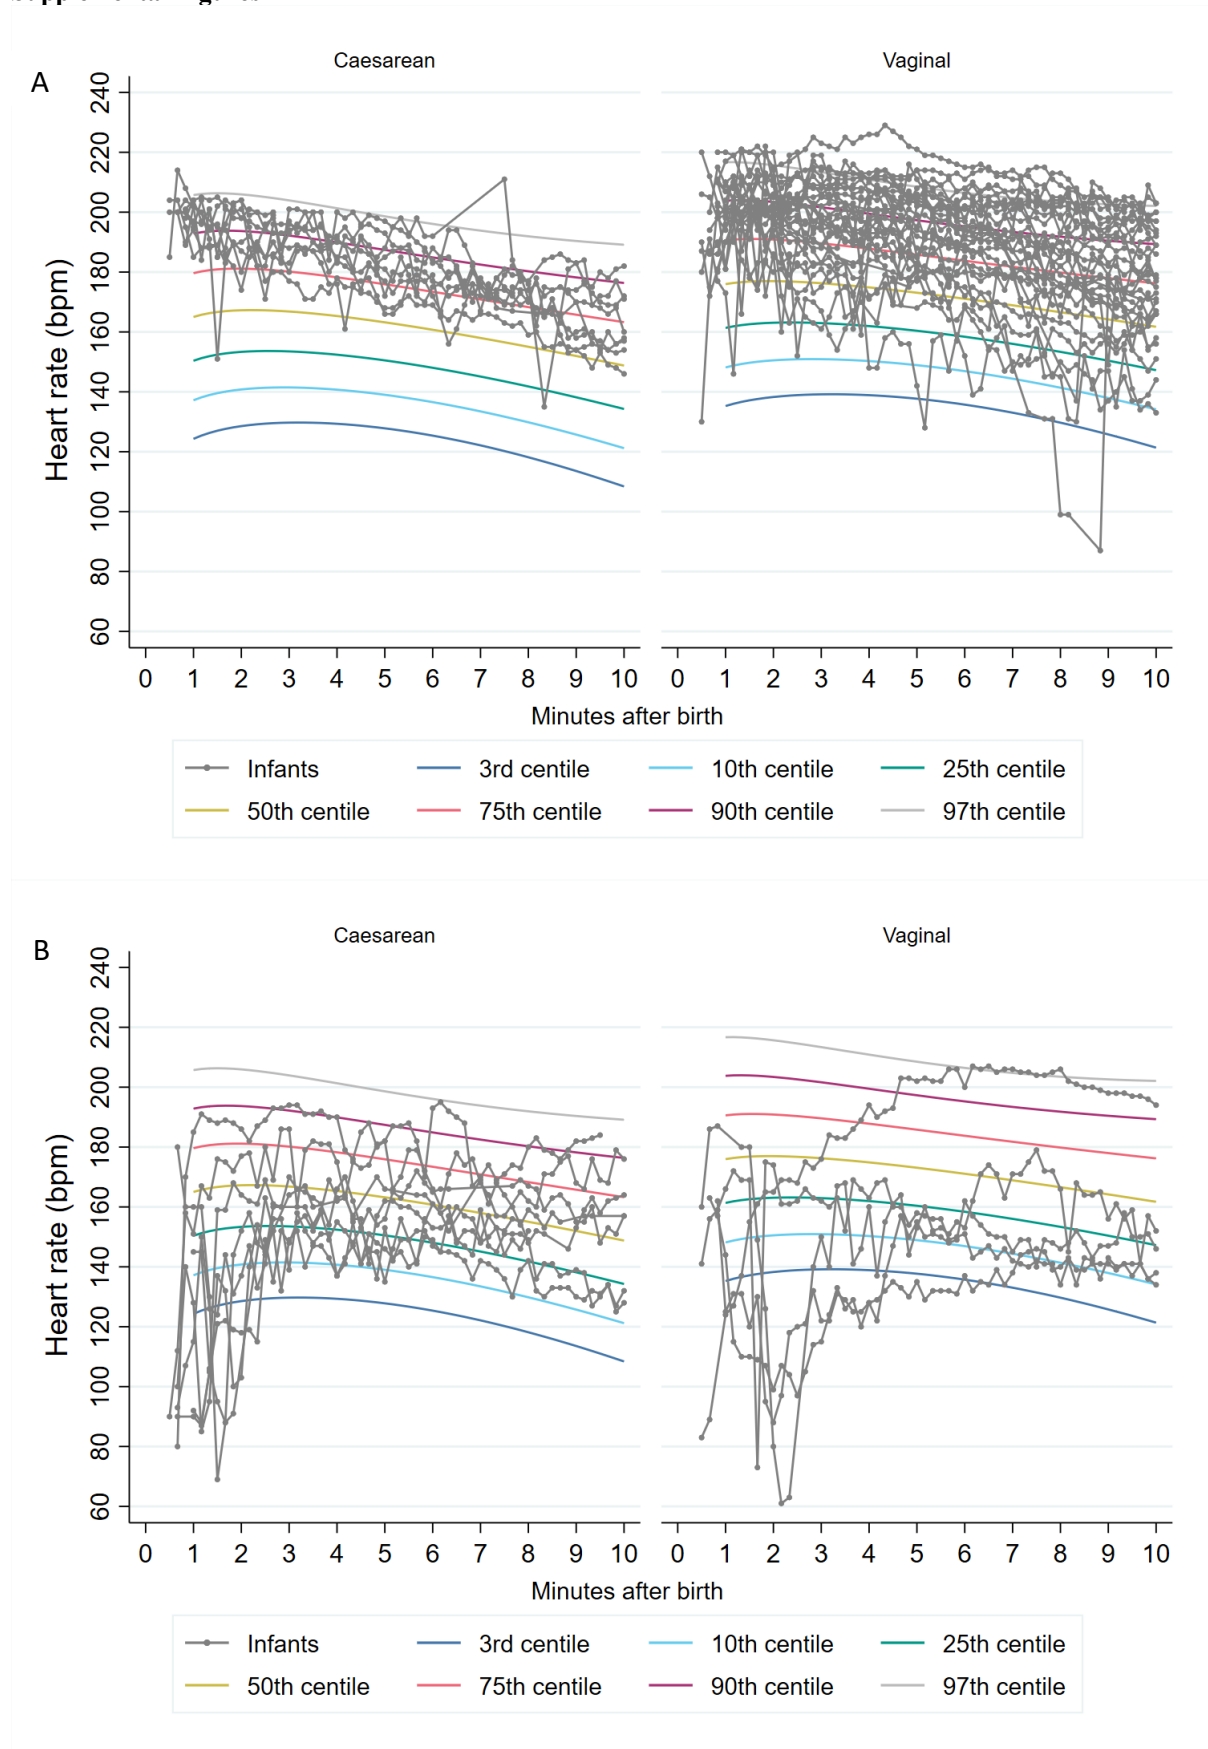

**Supplemental Fig A.** (A) Individual heart rate trajectories for infants with heart rate >200 beats per minute (bpm) within 2 minutes of birth and (B) infants with heart rate <100 bpm within 2 minutes of birth.

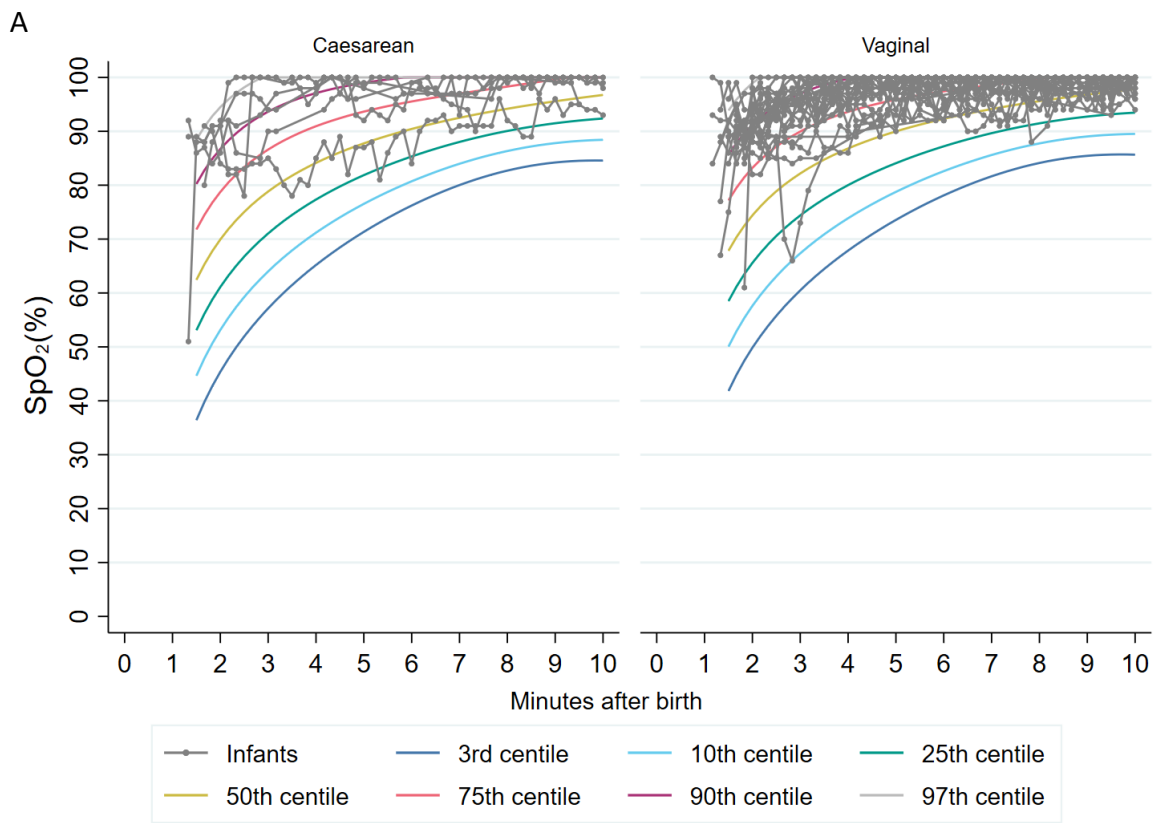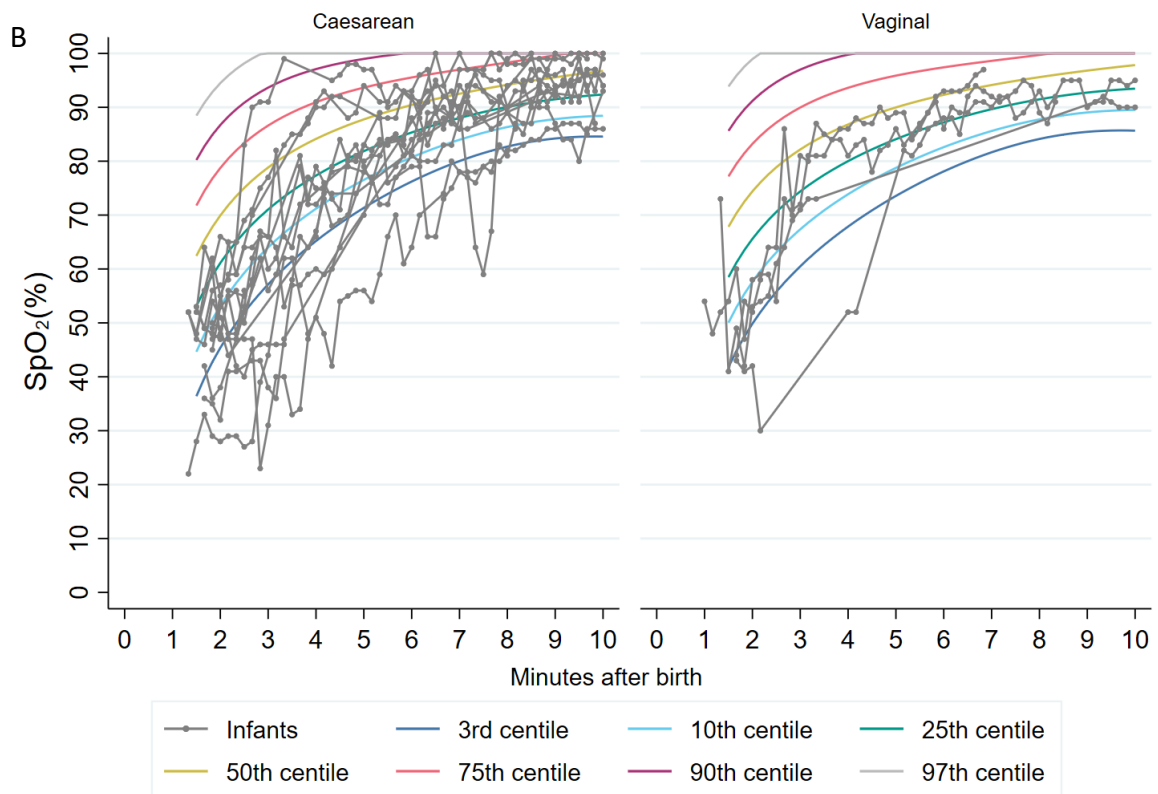

**Supplemental Fig B.** (A) Individual trajectories of oxygen saturation (SpO<sub>2</sub>) for infants with SpO<sub>2</sub> > 90% within 2 minutes of birth and (B) infants with SpO<sub>2</sub> < 50% within 2 minutes of birth.
